# Supplementary material for: Long Term Delta-9-tetrahydrocannabinol Administration Inhibits Proinflammatory Responses in Minor Salivary Glands of Chronically Simian Immunodeficieny Virus Infected Rhesus Macaques
Source: MDPI journal article supplement (doi:10.3390/v12070713), 2020-07-01
Supplement: s1 [file s1]

Supplemental Table 1. List of Upregulated genes in OPM of VEH-untreated/SIV compared to control rhesus macaques

| Gene Symbol | Gene Name                                                   | Control Read Count | VEH-untreated/SIV Read Count | Fold Change | P value  |
|-------------|-------------------------------------------------------------|--------------------|------------------------------|-------------|----------|
| HLA-DQB1    | MHC Class II Antigen HLA-DQ-Beta-1                          | 1.0                | 273.4                        | 272.9       | 2.12E-02 |
| KLK6        | Kallikrein Related Peptidase 6                              | 51.4               | 934.0                        | 18.2        | 6.79E-04 |
| IFI44       | Interferon Induced Protein 44                               | 80.8               | 1405.4                       | 17.4        | 3.56E-04 |
| DDX60       | DExD/H-Box Helicase 60                                      | 245.8              | 2922.5                       | 11.9        | 2.97E-07 |
| IL36A       | Interleukin 36 alpha                                        | 322.4              | 3826.9                       | 11.9        | 1.70E-02 |
| IFI6        | Interferon Alpha Inducible Protein 6                        | 429.0              | 4935.3                       | 11.5        | 3.33E-04 |
| IFI44L      | Interferon Induced Protein 44 Like                          | 21.5               | 236.0                        | 11.0        | 2.27E-05 |
| DEFB103     | Defensin-beta 103                                           | 67.8               | 712.1                        | 10.5        | 2.81E-03 |
| KLK9        | Kallikrein Related Peptidase 9                              | 45.9               | 446.1                        | 9.7         | 1.22E-02 |
| IFIT3       | Interferon Induced Protein with Tetratricopeptide Repeats 3 | 114.9              | 988.7                        | 8.6         | 8.73E-06 |
| ISG15       | Interferon-Stimulated Protein, 15 KDa                       | 547.6              | 4382.2                       | 8.0         | 1.50E-03 |
| MX1         | Myxovirus Resistance Protein 1                              | 360.8              | 2588.3                       | 7.2         | 1.09E-07 |
| IFIT1       | Interferon Induced Protein with Tetratricopeptide Repeats 1 | 82.4               | 421.9                        | 5.1         | 8.17E-04 |
| OAS2        | 2'-5'-oligoadenylate                                        | 133.6              | 657.4                        | 4.9         | 1.47E-05 |
| KLK8        | Kallikrein Related Peptidase 8                              | 403.0              | 1959.8                       | 4.9         | 4.75E-03 |
| DDX58       | DExD/H-Box Helicase 58                                      | 163.8              | 779.2                        | 4.8         | 2.10E-05 |
| DHX58       | DExH-Box Helicase 58                                        | 114.6              | 449.8                        | 3.9         | 3.65E-08 |
| BST2        | Bone Marrow Stromal Antigen 2                               | 462.7              | 1810.0                       | 3.9         | 2.54E-03 |
| OAS1        | 2'-5'-Oligoadenylate Synthetase 1                           | 291.2              | 1133.8                       | 3.9         | 9.38E-08 |
| GBP2        | Guanylate Binding Protein 2                                 | 449.1              | 1744.2                       | 3.9         | 4.81E-03 |
| ERO1A       | Endoplasmic Reticulum Oxidoreductase 1 Alpha                | 3634.5             | 13291.6                      | 3.7         | 4.41E-03 |
| APOL2       | Apolipoprotein L2                                           | 255.8              | 880.6                        | 3.4         | 2.49E-02 |
| EPSTI1      | Epithelial Stromal Interaction 1                            | 53.5               | 171.9                        | 3.2         | 1.15E-02 |
| BNIP3       | BCL2 Interacting Protein 3                                  | 399.7              | 1224.1                       | 3.1         | 2.49E-03 |
| KLK7        | Kallikrein Related Peptidase 7                              | 259.0              | 766.4                        | 3.0         | 1.73E-02 |
| SLC26A9     | Solute Carrier Family 26 Member 9                           | 895.0              | 2597.3                       | 2.9         | 1.08E-03 |
| CD207       | Langerhans Cell Specific C-Type Lectin                      | 173.5              | 501.9                        | 2.9         | 3.54E-02 |
| IFIT5       | Interferon Induced Protein with Tetratricopeptide Repeats 5 | 57.3               | 164.0                        | 2.9         | 5.41E-03 |
| OASL        | 2'-5'-Oligoadenylate Synthetase Like                        | 55.1               | 156.3                        | 2.8         | 9.78E-03 |
| IFIH1       | Interferon Induced with Helicase C Domain 1                 | 280.6              | 762.9                        | 2.7         | 2.05E-05 |
| STAT1       | Signal Transducer and Activator of Transcription 1          | 2335.1             | 6225.8                       | 2.7         | 1.13E-05 |
| MAMU-A3     | major histocompatibility complex, class I, A                | 855.6              | 2262.5                       | 2.6         | 3.13E-02 |
| RNF213      | Ring Finger Protein 213                                     | 1041.5             | 2750.7                       | 2.6         | 6.36E-05 |
| PTPRH       | Protein Tyrosine Phosphatase Receptor Type H                | 502.5              | 1324.2                       | 2.6         | 4.05E-02 |
| PELI3       | Pellino E3 Ubiquitin Protein Ligase Family Member 3         | 94.9               | 249.0                        | 2.6         | 9.47E-05 |
| DDX60L      | DEAD-Box Helicase 60 Like                                   | 48.5               | 125.9                        | 2.6         | 3.86E-04 |
| CLDN17      | Claudin 17                                                  | 537.0              | 1338.3                       | 2.5         | 4.81E-02 |
| RBP1        | Retinol binding protein 1                                   | 182.0              | 448.9                        | 2.5         | 3.30E-03 |
| GAL9        | Galectin 9                                                  | 267.8              | 654.1                        | 2.4         | 3.82E-04 |
| B2M         | beta-2-microglobulin                                        | 10609.1            | 25778.0                      | 2.4         | 4.88E-04 |
| PARP14      | Poly (ADP-Ribose) Polymerase Family Member 14               | 237.5              | 573.3                        | 2.4         | 3.54E-04 |
| S100A9      | S100 Calcium Binding Protein A9                             | 99397.7            | 239638.3                     | 2.4         | 3.19E-03 |
| KRT78       | Keratin 78                                                  | 20592.8            | 49484.0                      | 2.4         | 2.68E-04 |
| SAMD9L      | Sterile Alpha Motif Domain Containing 9 Like                | 352.5              | 827.7                        | 2.3         | 5.51E-03 |
| YOD1        | YOD1 Deubiquitinase                                         | 199.6              | 454.9                        | 2.3         | 1.06E-03 |
| COL1A1      | Collagen Type I Alpha 1 Chain                               | 337.1              | 759.8                        | 2.3         | 4.72E-02 |
| TGFA        | Transforming growth factor alpha                            | 178.3              | 401.0                        | 2.2         | 7.47E-04 |
| KIFC3       | Kinesin Family Member C3                                    | 694.3              | 1545.5                       | 2.2         | 3.87E-03 |
| LPIN1       | Lipin 1                                                     | 651.0              | 1428.1                       | 2.2         | 1.44E-02 |
| TRIM22      | Tripartite Motif Containing 22                              | 759.9              | 1664.4                       | 2.2         | 7.57E-03 |

Supplemental Table 2. List of Upregulated genes in OPM of THC/SIV compared to control rhesus macaques

| Gene Symbol | Gene Name                                                   | Control<br>Read Count | THC/SIV<br>Read Count | Fold<br>Change | P value  |
|-------------|-------------------------------------------------------------|-----------------------|-----------------------|----------------|----------|
| IFI27       | Interferon Alpha Inducible Protein 27                       | 269.4                 | 8048.0                | 29.9           | 2.19E-02 |
| IFI44       | Interferon Induced Protein 44                               | 83.5                  | 1743.7                | 20.9           | 1.15E-03 |
| IFI44L      | Interferon Induced Protein 44 Like                          | 22.2                  | 459.8                 | 20.7           | 6.28E-04 |
| DDX60       | DExD/H-Box Helicase 60                                      | 254.0                 | 3647.3                | 14.4           | 7.14E-04 |
| ISG15       | ISG15 Ubiquitin Like Modifier                               | 565.4                 | 6834.0                | 12.1           | 1.25E-02 |
| IFI6        | Interferon Alpha Inducible Protein 6                        | 443.6                 | 5353.9                | 12.1           | 2.55E-03 |
| HERC6       | HECT Domain and RCC1-Like Domain-Containing Protein 6       | 106.7                 | 1247.5                | 11.7           | 2.97E-03 |
| IFIT3       | Interferon Induced Protein with Tetratricopeptide Repeats 3 | 118.7                 | 1214.6                | 10.2           | 1.58E-02 |
| XAF1        | XIAP Associated Factor 1                                    | 23.8                  | 184.0                 | 7.7            | 6.47E-03 |
| MX1         | Myxoma Resistance Protein 1                                 | 372.7                 | 2563.3                | 6.9            | 2.19E-02 |
| DDX58       | DExD/H-Box Helicase 58                                      | 169.3                 | 983.6                 | 5.8            | 6.76E-03 |
| IFIT1       | Interferon Induced Protein with Tetratricopeptide Repeats 1 | 85.2                  | 487.4                 | 5.7            | 2.48E-02 |
| RSAD2       | Radical S-Adenosyl Methionine Domain Containing 2           | 51.3                  | 260.2                 | 5.1            | 4.47E-03 |
| IRF7        | Interferon Regulatory Factor 7                              | 187.9                 | 886.1                 | 4.7            | 1.77E-02 |
| CMPK2       | Cytidine/Uridine Monophosphate Kinase 2                     | 41.8                  | 180.9                 | 4.3            | 1.60E-02 |
| OAS1        | 2'-5'-Oligoadenylate Synthetase 1                           | 300.8                 | 1063.7                | 3.5            | 3.16E-03 |
| DHX58       | DExH-Box Helicase 58                                        | 118.4                 | 413.8                 | 3.5            | 5.04E-03 |
| GZMK        | Granzyme K                                                  | 59.1                  | 166.0                 | 2.8            | 1.70E-02 |
| TRIM22      | Tripartite Motif Containing 22                              | 786.1                 | 2204.6                | 2.8            | 2.23E-02 |
| IFIH1       | Interferon Induced with Helicase C Domain 1                 | 289.9                 | 800.6                 | 2.8            | 1.76E-02 |
| DDX60L      | DExD/H-Box 60 Like                                          | 50.2                  | 123.4                 | 2.5            | 4.54E-03 |
| STAT1       | Signal Transducer And Activator Of Transcription 1          | 2412.0                | 5690.6                | 2.4            | 2.14E-02 |
| PPM1K       | Protein Phosphatase, Mg2+/Mn2+ Dependent 1K                 | 299.8                 | 701.3                 | 2.3            | 1.81E-03 |
| TRIM14      | Tripartite Motif Containing 14                              | 275.5                 | 640.8                 | 2.3            | 4.28E-03 |
| GBP2        | Guanylate Binding Protein 2                                 | 464.1                 | 1042.7                | 2.2            | 1.15E-02 |
| LGALS9A     | Galectin 9                                                  | 276.7                 | 620.6                 | 2.2            | 5.60E-03 |
| TRIM5       | Tripartite Motif Containing 5                               | 331.1                 | 712.0                 | 2.2            | 3.42E-02 |
| PHTF2       | Putative Homeodomain Transcription Factor 2                 | 399.4                 | 854.5                 | 2.1            | 1.17E-02 |
| HELZ2       | Helicase with Zinc Finger 2                                 | 264.6                 | 560.4                 | 2.1            | 3.74E-02 |
| SLFN5       | Schlafen Family Member 5                                    | 599.8                 | 1229.7                | 2.1            | 1.77E-02 |
| PARP12      | Poly (ADP-Ribose) Polymerase Family Member 12               | 258.1                 | 528.2                 | 2.0            | 6.81E-03 |
| SCML1       | Scm Polycomb Group Protein Like 1                           | 116.5                 | 236.0                 | 2.0            | 4.61E-02 |
| PARP14      | Poly (ADP-Ribose) Polymerase Family Member 14               | 245.4                 | 495.4                 | 2.0            | 4.37E-02 |
| KSR1        | Kinase Suppressor of Ras 1                                  | 638.8                 | 1264.6                | 2.0            | 3.59E-02 |
| ADM         | Adrenomedullin                                              | 105.8                 | 208.7                 | 2.0            | 1.96E-02 |
| CHPT1       | Choline Phosphotransferase 1                                | 4771.3                | 9390.5                | 2.0            | 2.91E-02 |
| LRRC17      | Leucine Rich Repeat Containing 17                           | 98.5                  | 190.4                 | 1.9            | 1.67E-02 |
| B2M         | Beta-2-Microglobulin                                        | 10966.5               | 21159.0               | 1.9            | 1.26E-02 |
| CEP85       | Centrosomal Protein 85                                      | 355.1                 | 679.3                 | 1.9            | 4.77E-02 |
| TIGAR       | TP53 Induced Glycolysis Regulatory Phosphatase              | 366.2                 | 695.6                 | 1.9            | 1.46E-02 |
| SAMD9L      | Sterile Alpha Motif Domain Containing 9 Like                | 364.1                 | 689.4                 | 1.9            | 4.46E-02 |
| APOL2       | Apolipoprotein L2                                           | 264.5                 | 499.1                 | 1.9            | 1.58E-02 |
| RNF213      | Ring Finger Protein 213                                     | 1076.5                | 2024.7                | 1.9            | 2.10E-02 |
| PHACTR2     | Phosphatase And Actin Regulator 2                           | 817.9                 | 1536.1                | 1.9            | 1.85E-02 |
| ABHD18      | Abhydrolase Domain Containing 18                            | 118.5                 | 220.2                 | 1.9            | 3.10E-02 |
| RND3        | Rho Family GTPase 3                                         | 4102.4                | 7479.3                | 1.8            | 1.53E-02 |
| ARIH1       | Ariadne RBR E3 Ubiquitin Protein Ligase 1                   | 615.3                 | 1101.4                | 1.8            | 4.89E-02 |
| SNX24       | Sorting Nexin 24                                            | 444.1                 | 777.2                 | 1.8            | 3.93E-02 |
| UBL3        | Ubiquitin Like 3                                            | 836.9                 | 1454.2                | 1.7            | 4.68E-02 |
| ESPL1       | Extra Spindle Pole Bodies Like 1, Separase                  | 249.1                 | 430.8                 | 1.7            | 4.03E-02 |

Supplemental Table 3. List of downregulated genes in OPM of VEH-untreated/SIV compared to control rhesus macaques

| Gene Symbol | Gene Name                                                        | Control Read Count | VEH-untreated/SIV Read Count | Fold Change | P value  |
|-------------|------------------------------------------------------------------|--------------------|------------------------------|-------------|----------|
| CHST4       | Carbohydrate Sulfotransferase 4                                  | 245.6              | 80.1                         | -3.1        | 1.31E-05 |
| SLC44A4     | Solute Carrier Family 44 Member 4                                | 308.7              | 102.4                        | -3.0        | 4.73E-03 |
| AGR2        | Anterior gradient 2, Protein Disulphide Isomerase Family Member  | 2465.5             | 880.7                        | -2.8        | 2.27E-05 |
| AOX1        | Aldehyde Oxidase 1                                               | 308.8              | 110.5                        | -2.8        | 2.49E-02 |
| ABCC9       | ATP Binding Cassette Subfamily C Member 9                        | 109.8              | 40.7                         | -2.7        | 4.57E-03 |
| NKX3-1      | NK3 Homeobox 1                                                   | 493.4              | 188.6                        | -2.6        | 2.56E-02 |
| C4BPA       | Complement Component 4 Binding Protein Alpha                     | 249.0              | 95.9                         | -2.6        | 1.12E-02 |
| TMC5        | Transmembrane Channel Like 5                                     | 378.8              | 149.8                        | -2.5        | 4.80E-03 |
| SEL1L3      | SEL1L Family Member 3                                            | 545.3              | 217.5                        | -2.5        | 4.67E-02 |
| S100A1      | S100 Calcium Binding Protein A1                                  | 676.5              | 272.3                        | -2.5        | 5.18E-05 |
| ABCA4       | ATP Binding Cassette Subfamily A Member 4                        | 137.6              | 57.4                         | -2.4        | 1.10E-02 |
| WFDC2       | WAP Four-Disulfide Core Domain 2                                 | 1377.6             | 583.7                        | -2.4        | 1.33E-02 |
| FOLR1       | Folate Receptor 1                                                | 225.7              | 99.3                         | -2.3        | 6.35E-04 |
| TRPV4       | Transient Receptor Potential Cation Channel Subfamily V Member 4 | 120.2              | 53.0                         | -2.3        | 1.53E-02 |
| GOLM1       | Golgi Membrane Protein 1                                         | 1255.0             | 571.0                        | -2.2        | 3.01E-03 |
| MEF2C       | Myocyte Enhancer Factor 2C                                       | 494.7              | 228.1                        | -2.2        | 4.86E-02 |
| ARHGAP24    | Rho GTPase Activating Protein 24                                 | 137.6              | 63.9                         | -2.2        | 2.33E-03 |
| ZNF177      | Zinc Finger Protein 177                                          | 156.3              | 72.8                         | -2.1        | 8.10E-03 |
| CP          | Ceruloplasmin                                                    | 181.8              | 85.4                         | -2.1        | 3.18E-02 |
| SYBU        | Syntabulin                                                       | 224.9              | 106.4                        | -2.1        | 1.22E-02 |
| CDH11       | Cadherin 11                                                      | 263.2              | 125.6                        | -2.1        | 8.29E-04 |
| TENT5C      | Terminal Nucleotidyltransferase 5C                               | 254.4              | 125.5                        | -2.0        | 4.77E-02 |
| CREB3L4     | CAMP Responsive Element Binding Protein 3 Like 4                 | 140.2              | 70.0                         | -2.0        | 3.17E-03 |
| KIAA1324    | Estrogen-Induced Gene 121 Protein                                | 552.5              | 277.8                        | -2.0        | 4.52E-02 |
| KCNMA1      | Potassium Calcium-Activated Channel Subfamily M Alpha 1          | 387.1              | 198.1                        | -2.0        | 1.41E-02 |
| CMAH        | CMP-N-Acetylneuraminic Acid Hydroxylase                          | 373.5              | 191.2                        | -2.0        | 1.60E-03 |
| UCHL1       | Ubiquitin C-Terminal Hydrolase L1                                | 145.2              | 74.5                         | -1.9        | 6.99E-03 |
| PRR15L      | Proline Rich 15 Like                                             | 170.9              | 88.7                         | -1.9        | 3.84E-02 |
| CDCA7L      | Cell Division Cycle Associated 7 Like                            | 214.8              | 113.4                        | -1.9        | 3.04E-02 |
| LRIG1       | Leucine Rich Repeats and Immunoglobulin Like Domains 1           | 485.8              | 259.4                        | -1.9        | 5.86E-03 |
| SERPINE2    | Serpin Family E Member 2                                         | 306.0              | 164.6                        | -1.9        | 3.52E-02 |
| TMEM45A     | Transmembrane Protein 45A                                        | 174.3              | 95.0                         | -1.8        | 1.76E-02 |
| ZFX         | Zinc Finger Protein X-Linked                                     | 235.2              | 128.4                        | -1.8        | 6.76E-03 |
| SLC22A17    | Solute Carrier Family 22 Member 17                               | 343.9              | 189.7                        | -1.8        | 6.41E-03 |
| RGS16       | Regulator of G Protein Signaling 16                              | 215.7              | 122.2                        | -1.8        | 1.53E-02 |
| ARSD        | Arylsulfatase D                                                  | 151.6              | 87.1                         | -1.7        | 3.55E-02 |
| IQGAP2      | IQ Motif Containing GTPase Activating Protein 2                  | 310.6              | 180.9                        | -1.7        | 1.42E-02 |
| MFSD4A      | Major Facilitator Superfamily Domain Containing 4A               | 348.1              | 203.4                        | -1.7        | 2.70E-02 |
| PDGFC       | Platelet Derived Growth Factor C                                 | 192.1              | 113.3                        | -1.7        | 1.94E-02 |
| ZNF608      | Zinc Finger Protein 608                                          | 225.6              | 133.4                        | -1.7        | 1.12E-02 |
| BCL6        | B-Cell Lymphoma 6 Protein                                        | 910.7              | 540.5                        | -1.7        | 1.41E-02 |
| FGF7        | Fibroblast Growth Factor 7                                       | 161.0              | 96.3                         | -1.7        | 4.24E-02 |
| FKBP5       | FKBP Prolyl Isomerase 5                                          | 291.4              | 177.5                        | -1.6        | 3.26E-02 |
| TSC22D3     | Glucocorticoid-Induced Leucine Zipper Protein                    | 1514.3             | 927.0                        | -1.6        | 2.09E-02 |
| ANO1        | Anoctamin 1                                                      | 239.6              | 146.8                        | -1.6        | 2.28E-02 |
| RNASE4      | Ribonuclease A Family Member 4                                   | 2701.9             | 1667.4                       | -1.6        | 4.98E-02 |
| MAGED1      | MAGE Family Member D1                                            | 587.5              | 376.9                        | -1.6        | 4.57E-02 |
| CAT         | Catalase                                                         | 981.2              | 636.0                        | -1.5        | 2.62E-02 |
| CERK        | Ceramide Kinase                                                  | 604.8              | 392.1                        | -1.5        | 2.83E-02 |
| PC          | Pyruvate Carboxylase                                             | 297.4              | 194.4                        | -1.5        | 4.71E-02 |

Supplemental Table 4. List of downregulated genes in OPM of THC/SIV compared to control rhesus macaques

| Gene Symbol | Gene Name                                                                                         | Control Read Count | THC/SIV Read Count | Fold Change | P value  |
|-------------|---------------------------------------------------------------------------------------------------|--------------------|--------------------|-------------|----------|
| NRAP        | Nebulin Related Anchoring Protein                                                                 | 732.1              | 11.4               | -64.3       | 1.86E-02 |
| TPM1        | Tropomyosin 1                                                                                     | 1657.2             | 374.5              | -4.4        | 2.15E-02 |
| GOLM1       | Golgi Membrane Protein 1                                                                          | 1296.6             | 490.4              | -2.6        | 2.48E-02 |
| HSPB7       | Heat Shock Protein Family B (Small) Member 7                                                      | 182.5              | 3.9                | -46.7       | 2.88E-03 |
| PFKM        | Phosphofructokinase, Muscle                                                                       | 752.8              | 374.0              | -2.0        | 3.42E-02 |
| PGAM1       | Phosphoglycerate mutase 1                                                                         | 305.3              | 13.1               | -23.2       | 1.85E-02 |
| GAMT        | Guanidinoacetate N-Methyltransferase                                                              | 180.9              | 91.1               | -2.0        | 4.77E-02 |
| MMP7        | Matrix Metalloproteinase 7                                                                        | 154.7              | 52.5               | -2.9        | 2.44E-02 |
| TNNI2       | Troponin I2, Fast Skeletal Type                                                                   | 1662.5             | 100.4              | -16.6       | 4.39E-02 |
| MLF1        | Myeloid Leukemia Factor 1                                                                         | 125.0              | 19.1               | -6.5        | 2.63E-02 |
| MB          | Myoglobin                                                                                         | 3126.5             | 53.9               | -58.0       | 1.98E-02 |
| SYNM        | Synemin                                                                                           | 256.3              | 102.5              | -2.5        | 4.96E-02 |
| CP          | Ceruloplasmin                                                                                     | 187.6              | 56.7               | -3.3        | 5.23E-03 |
| RGS16       | Regulator of G Protein Signaling 16                                                               | 222.9              | 81.1               | -2.7        | 2.10E-03 |
| SMARCD3     | SWI/SNF Related, Matrix Associated, Actin Dependent Regulator of Chromatin, Subfamily D, Member 3 | 142.1              | 57.4               | -2.5        | 1.38E-02 |
| CKMT2       | Creatine Kinase, Mitochondrial 2                                                                  | 194.8              | 8.5                | -22.9       | 9.46E-03 |
| CYB5R1      | Cytochrome B5 Reductase 1                                                                         | 165.1              | 62.0               | -2.7        | 1.88E-02 |
| FHL1        | Four and A Half LIM Domains 1                                                                     | 3395.6             | 820.3              | -4.1        | 2.33E-02 |
| NEB         | Nebulin                                                                                           | 1108.3             | 19.9               | -55.7       | 2.83E-03 |
| LMOD3       | Leiomodin 3                                                                                       | 167.7              | 3.3                | -50.7       | 8.06E-03 |
| SYNPO2      | Synaptopodin 2                                                                                    | 187.2              | 19.1               | -9.8        | 3.74E-02 |
| TTN         | Titin                                                                                             | 2823.0             | 64.3               | -43.9       | 6.73E-03 |
| CUEDC1      | CUE Domain Containing 1                                                                           | 268.7              | 136.7              | -2.0        | 3.90E-02 |
| TRDN        | Triadin                                                                                           | 201.3              | 2.9                | -70.4       | 7.92E-03 |
| MYH8        | Myosin Heavy Chain 8                                                                              | 321.3              | 12.1               | -26.6       | 3.08E-02 |
| MYH1        | Myosin Heavy Chain 1                                                                              | 2232.5             | 2.0                | -1099.6     | 2.83E-03 |
| MYH2        | Myosin Heavy Chain 2                                                                              | 4599.1             | 18.2               | -252.1      | 5.50E-03 |
| FOLR1       | Folate Receptor Alpha                                                                             | 233.2              | 112.1              | -2.1        | 3.39E-02 |
| RERG        | RAS Like Estrogen Regulated Growth Inhibitor                                                      | 302.7              | 147.8              | -2.0        | 3.28E-02 |
| MYL1        | Myosin Light Chain 1                                                                              | 1422.2             | 9.0                | -157.3      | 4.25E-04 |
| ENO3        | Enolase 3                                                                                         | 1609.9             | 31.1               | -51.8       | 4.85E-03 |
| XIRP2       | Xin Actin Binding Repeat Containing 2                                                             | 315.2              | 12.4               | -25.4       | 6.35E-03 |
| TMC5        | Transmembrane Channel Like 5                                                                      | 391.5              | 117.9              | -3.3        | 8.46E-03 |
| CKM         | Creatine Kinase, M-Type                                                                           | 2831.9             | 22.5               | -126.0      | 4.61E-03 |
| MYOZ1       | Myozenin 1                                                                                        | 868.4              | 8.1                | -107.5      | 4.76E-03 |
| LTF         | Lactotransferrin                                                                                  | 319.4              | 55.8               | -5.7        | 3.94E-02 |
| CYBA        | Cytochrome B-245 Alpha Chain                                                                      | 456.1              | 244.4              | -1.9        | 4.00E-02 |
| NGFR        | Nerve Growth Factor Receptor                                                                      | 215.5              | 106.8              | -2.0        | 3.28E-02 |
| PDLIM3      | PDZ And LIM Domain 3                                                                              | 725.1              | 165.2              | -4.4        | 3.10E-02 |
| TPM2        | Tropomyosin 2                                                                                     | 2373.0             | 120.7              | -19.7       | 2.15E-02 |
| MYOT        | Myotilin                                                                                          | 366.0              | 5.3                | -68.8       | 9.62E-03 |
| RASSF4      | Ras Association Domain Family Member 4                                                            | 233.9              | 70.2               | -3.3        | 6.35E-04 |
| DES         | Desmin                                                                                            | 1423.1             | 44.9               | -31.7       | 3.75E-03 |
| CREB3L1     | CAMP Responsive Element Binding Protein 3 Like 1                                                  | 272.1              | 116.5              | -2.3        | 4.22E-02 |
| TGM2        | Transglutaminase 2                                                                                | 211.0              | 59.2               | -3.6        | 2.89E-02 |
| SFRP1       | Secreted Frizzled Related Protein 1                                                               | 461.9              | 248.6              | -1.9        | 3.76E-02 |
| CSR3        | Cysteine And Glycine Rich Protein 3                                                               | 200.9              | 2.2                | -93.1       | 2.16E-02 |
| ACTN2       | Actinin Alpha 2                                                                                   | 298.8              | 8.0                | -37.1       | 2.66E-02 |
| CMYA5       | Cardiomyopathy Associated 5                                                                       | 675.1              | 36.8               | -18.3       | 1.99E-02 |
| APOBEC2     | Apolipoprotein B mRNA Editing Enzyme Catalytic Subunit 2                                          | 382.0              | 4.6                | -83.9       | 1.42E-02 |

Supplemental Table 5. List of Upregulated genes in OPM of VEH-untreated/SIV compared to THC/SIV rhesus macaques

| Gene Symbol | Gene Name                                                  | VEH-untreated/SIV<br>Read Count | THC/SIV<br>Read Count | Fold<br>Change | P value  |
|-------------|------------------------------------------------------------|---------------------------------|-----------------------|----------------|----------|
| RBP1        | Retinol Binding protein 1                                  | 426.8                           | 194.6                 | 2.2            | 3.40E-02 |
| SAMHD1      | SAM Domain And HD Domain-Containing Protein 1              | 664.8                           | 384.7                 | 1.7            | 4.84E-02 |
| PELI3       | Pellino E3 Ubiquitin Protein Ligase Family Member 3        | 237.0                           | 137.6                 | 1.7            | 2.69E-02 |
| IL4R        | Interleukin 4 Receptor                                     | 951.9                           | 479.6                 | 2.0            | 1.73E-02 |
| PAPSS2      | 3'-Phosphoadenosine 5'-Phosphosulfate Synthase 2           | 1471.9                          | 804.6                 | 1.8            | 9.87E-03 |
| ICAM4       | Intercellular Adhesion Molecule 4                          | 38.9                            | 13.8                  | 2.8            | 3.19E-02 |
| PXDC1       | PX Domain-Containing Protein 1                             | 237.7                           | 146.5                 | 1.6            | 4.15E-02 |
| NSUN7       | NOP2/Sun RNA Methyltransferase Family Member 7             | 225.5                           | 120.2                 | 1.9            | 2.10E-02 |
| WFDC5       | WAP Four-Disulfide Core Domain 5                           | 116.4                           | 17.2                  | 6.8            | 5.27E-03 |
| KLK6        | Kallikrein Related Peptidase 6                             | 891.2                           | 64.6                  | 13.8           | 9.54E-03 |
| THEM4       | Thioesterase Superfamily Member 4                          | 143.2                           | 85.7                  | 1.7            | 4.41E-02 |
| ICAM1       | Intercellular Adhesion Molecule 1                          | 259.0                           | 109.8                 | 2.4            | 2.79E-02 |
| CD93        | Complement Component C1q Receptor                          | 90.6                            | 39.2                  | 2.3            | 1.79E-02 |
| SLCO4A1     | Solute Carrier Organic Anion Transporter Family Member 4A1 | 247.8                           | 148.3                 | 1.7            | 4.52E-02 |
| SOC3        | Suppressor of cytokine signaling 3                         | 50.3                            | 12.6                  | 4.0            | 2.95E-02 |
| TMPRSS11F   | Transmembrane Serine Protease 11F                          | 426.8                           | 218.0                 | 2.0            | 1.22E-02 |
| AGPAT2      | 1-Acylglycerol-3-Phosphate O-Acyltransferase 2             | 1450.1                          | 829.6                 | 1.7            | 4.16E-02 |

Supplemental Table 6. List of Downregulated genes in OPM of VEH-untreated/SIV compared to THC/SIV rhesus macaques

| Gene Symbol | Gene Name                                      | VEH-untreated/SIV<br>Read Count | THC/SIV<br>Read Count | Fold<br>Change | P value  |
|-------------|------------------------------------------------|---------------------------------|-----------------------|----------------|----------|
| SYT8        | Synaptotagmin 8                                | 57.3                            | 266.2                 | -4.6           | 1.93E-02 |
| KATNAL1     | Katanin Catalytic Subunit A1 Like 1            | 16.0                            | 33.5                  | -2.1           | 4.67E-02 |
| CFAP53      | Cilia And Flagella Associated Protein 53       | 13.1                            | 33.8                  | -2.6           | 3.01E-02 |
| ZNF680      | Zinc Finger Protein 680                        | 35.8                            | 70.4                  | -2.0           | 3.98E-02 |
| ZNF837      | Zinc Finger Protein 837                        | 13.6                            | 31.1                  | -2.3           | 4.28E-02 |
| SNCAIP      | Synuclein Alpha Interacting Protein            | 19.6                            | 38.2                  | -2.0           | 4.79E-02 |
| SCML1       | Scm Polycomb Group Protein Like 1              | 117.9                           | 217.9                 | -1.8           | 4.28E-02 |
| PAPPA       | Pappalysin 1                                   | 19.0                            | 43.2                  | -2.3           | 1.80E-02 |
| SPHKAP      | SPHK1 Interactor, AKAP Domain Containing       | 27.3                            | 75.9                  | -2.8           | 6.24E-03 |
| MPP3        | Membrane Palmitoylated Protein 3               | 17.6                            | 42.1                  | -2.4           | 1.94E-02 |
| ZNF177      | Zinc Finger Protein 177                        | 69.2                            | 158.2                 | -2.3           | 1.07E-02 |
| STYXL1      | Serine/Threonine/Tyrosine Interacting Like 1   | 19.1                            | 71.9                  | -3.8           | 1.18E-04 |
| CYP2A23     | Cytochrome P450 Family 2 Subfamily A Member 23 | 165.6                           | 720.0                 | -4.3           | 2.94E-02 |
| BAIAP3      | BAI1 Associated Protein 3                      | 37.7                            | 81.4                  | -2.2           | 1.06E-02 |
| SLC2A12     | Solute Carrier Family 2 Member 12              | 54.8                            | 110.7                 | -2.0           | 4.67E-02 |
| NRBP2       | Nuclear Receptor Binding Protein 2             | 23.9                            | 45.7                  | -1.9           | 3.79E-02 |
| RASSF10     | Ras Association Domain Family Member 10        | 169.1                           | 370.7                 | -2.2           | 4.52E-02 |
