# Supplementary figures and images for: Long Term Delta-9-tetrahydrocannabinol Administration Inhibits Proinflammatory Responses in Minor Salivary Glands of Chronically Simian Immunodeficieny Virus Infected Rhesus Macaques
Source: MDPI journal article supplement (doi:10.3390/v12070713), 2020-07-01

**A** VEH-SIV-1

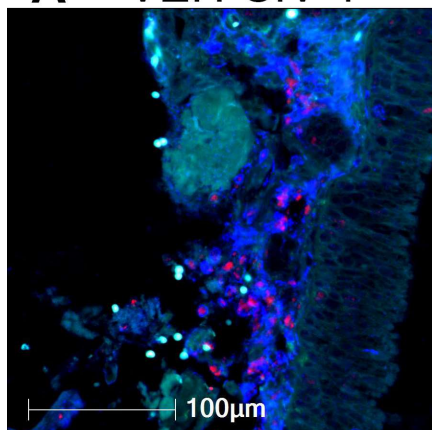

**B** VEH-SIV-2

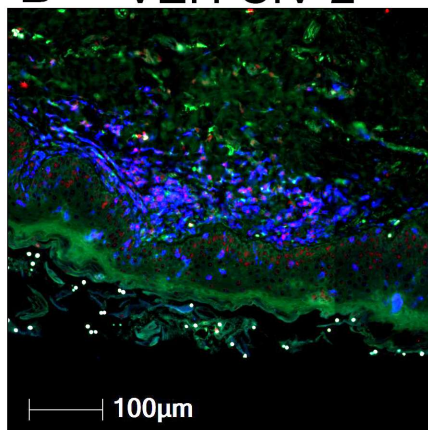

**C** VEH-SIV-3

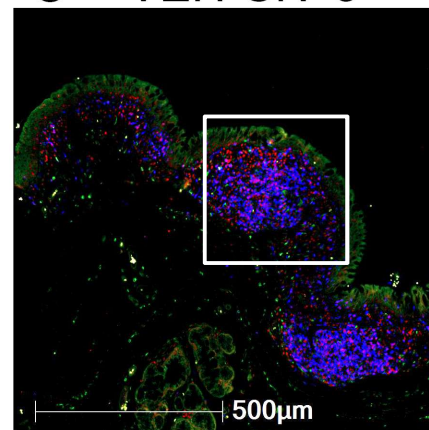

**D** THC-SIV-1

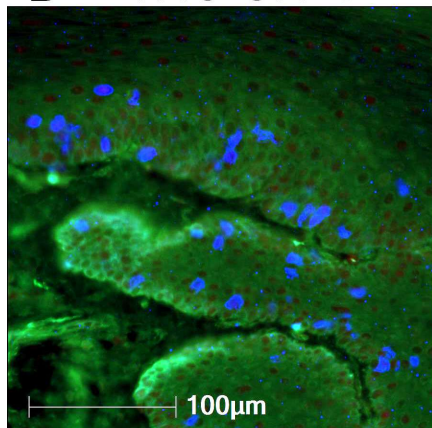

**E** THC-SIV-2

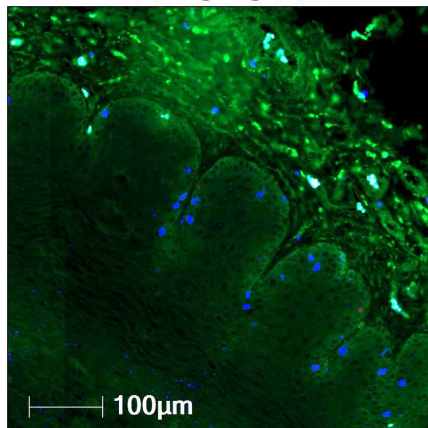

**F** THC-SIV-3

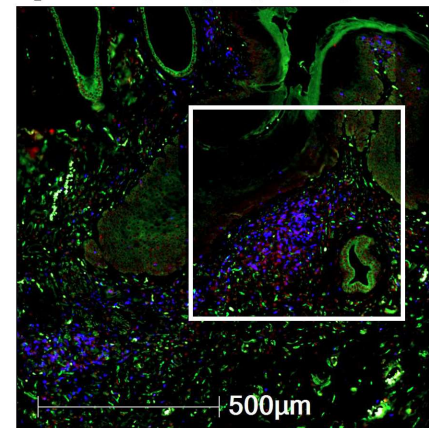

**G**

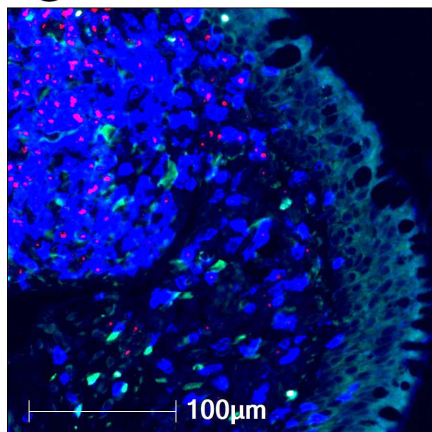

**H**

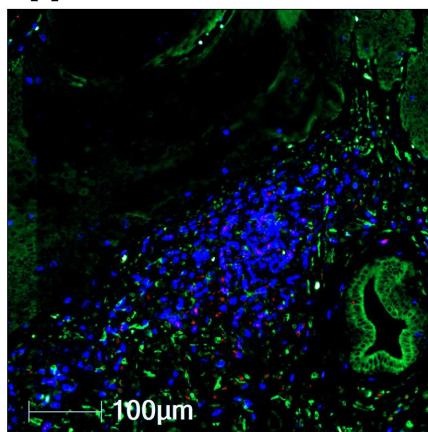

**I**

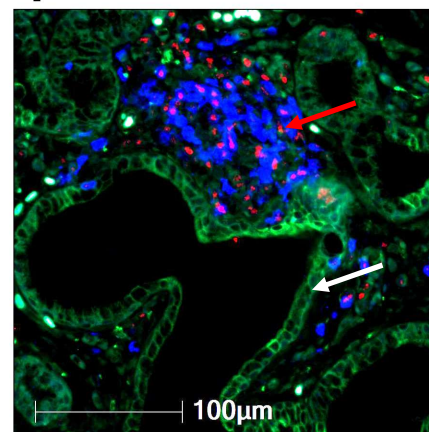

Supplement: s1 [file s1]

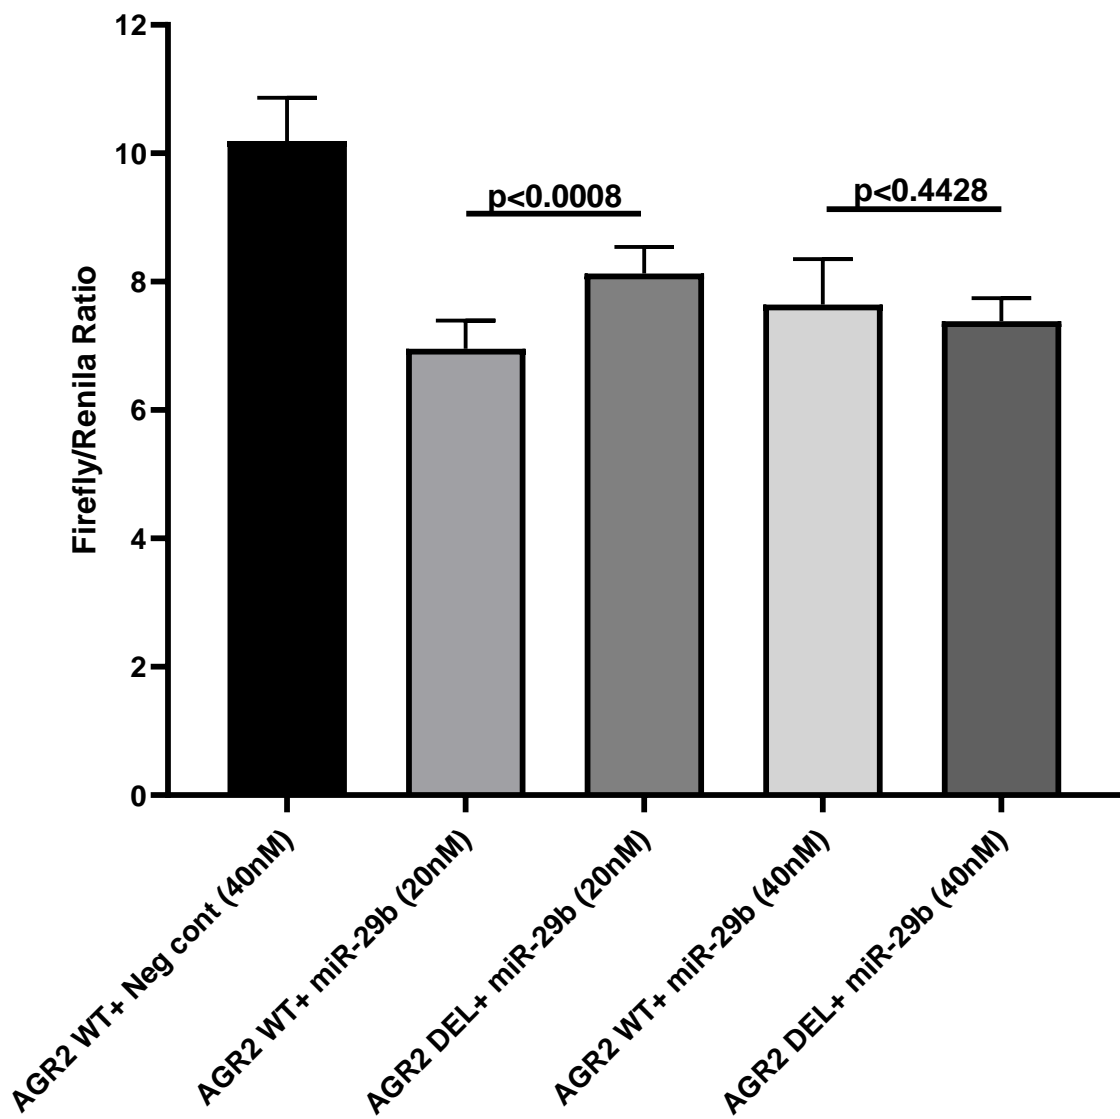

Supplement: s1 [file s1]
